# Supplementary material for: Two distinct phases of chloroplast biogenesis during de-etiolation in Arabidopsis thaliana
Source: bioRxiv or medRxiv preprint supplement (doi:10.1101/2020.08.30.274043), 2020-09-01
Supplement: Supplementary file [file media-9.pdf]

|                                                 | Method          | T0                                       | T4                                       | T8                                       | T12                                      | T24                                      | T48                                      | T72                                      | T96                                      |
|-------------------------------------------------|-----------------|------------------------------------------|------------------------------------------|------------------------------------------|------------------------------------------|------------------------------------------|------------------------------------------|------------------------------------------|------------------------------------------|
| <i>Chloroplast volume (μm<sup>3</sup>)</i>      | SBF-SEM         | <b>12.27</b><br>(± 2.3)                  | <b>9.4</b><br>(± 4.8)                    | —                                        | —                                        | <b>62</b><br>(± 2.04)                    | —                                        | —                                        | <b>112.14</b><br>(± 4.3)                 |
| <i>Thylakoid surface (μm<sup>2</sup>)</i>       | SBF-SEM         | —                                        | <b>67.0</b><br>(± 29.5)                  | —                                        | —                                        | <b>1476</b><br>(± 146)                   | —                                        | —                                        | <b>2086</b><br>(± 393)                   |
| <i>Grana lamellae / total thylakoid surface</i> |                 | —                                        | —                                        | —                                        | —                                        | <b>2.55</b><br>(± 0.11)                  | —                                        | —                                        | <b>2.08</b><br>(± 0.57)                  |
| <i>Thylakoid/envelope surface</i>               |                 | —                                        | <b>1.02</b><br>(± 0.15)                  | —                                        | —                                        | <b>7.37</b><br>(± 0.51)                  | —                                        | —                                        | <b>6.83</b><br>(± 1.40)                  |
| <i>Length of plastid (μm)</i>                   | TEM             | <b>2</b><br>(± 0.90)                     | <b>2.8</b><br>(± 0.90)                   | —                                        | —                                        | <b>5.1</b><br>(± 1.47)                   | —                                        | —                                        | <b>6</b><br>(± 1.62)                     |
| <i>Stroma lamellae volume (μm<sup>3</sup>)</i>  | SBF-SEM         | —                                        | <b>2.43</b><br>(± 0.95)                  | —                                        | —                                        | <b>17.87</b><br>(± 1.04)                 | —                                        | —                                        | <b>29.17</b><br>(± 19.4)                 |
| <i>Chloroplast volume (μm<sup>3</sup>)</i>      | Confocal        | —                                        | —                                        | —                                        | —                                        | <b>61.5</b><br>(± 11.2)                  | <b>70.1</b><br>(± 10.2)                  | <b>85</b><br>(± 22)                      | —                                        |
| <i>Cell Volume (μm<sup>3</sup>)</i>             | 3 View          | <b>1173</b><br>(± 284)                   | <b>1891</b><br>(± 362)                   | —                                        | —                                        | <b>6103</b><br>(± 1309)                  | —                                        | —                                        | <b>52597</b><br>(± 12671)                |
| <i>Cell perimeter (μm)</i>                      | TEM             | —                                        | —                                        | —                                        | —                                        | <b>55.26</b><br>(± 6.1)                  | <b>46.43</b><br>(± 5.3)                  | <b>71.68</b><br>(± 7.0)                  | <b>92.77</b><br>(± 11.1)                 |
| <i>Number of chloroplast per cell</i>           | SBF-SEM         | <b>22</b><br>(± 6)                       | <b>25</b><br>(± 8)                       | —                                        | —                                        | <b>26</b><br>(± 6)                       | —                                        | —                                        | <b>112</b><br>(± 29)                     |
| <i>Number of cell per seedling</i>              |                 | —                                        | —                                        | —                                        | —                                        | <b>≈ 3000</b>                            | —                                        | —                                        | <b>≈ 3000</b>                            |
| <i>Protein/GLs surface</i>                      |                 | <b>0.19</b><br>(± 0.05)                  | <b>0.23</b><br>(± 0.04)                  | <b>0.34</b><br>(± 0.03)                  | <b>0.52</b><br>(± 0.07)                  | <b>0.80</b><br>(± 0.14)                  | <b>0.80</b><br>(± 0.17)                  | <b>0.78</b><br>(± 0.07)                  | <b>0.87</b><br>(± 0.25)                  |
| <i>GLs (nmol/seedling)</i>                      | Lipidomics      | <b>0.31</b><br>(± 0.03)                  | <b>0.31</b><br>(± 0.02)                  | <b>0.32</b><br>(± 0.02)                  | <b>0.54</b><br>(± 0.02)                  | <b>0.67</b><br>(± 0.04)                  | <b>1.28</b><br>(± 0.12)                  | <b>1.84</b><br>(± 0.01)                  | <b>2.20</b><br>(± 0.09)                  |
| <i>PsbA (nmol/seedling)</i>                     | Immunodetection | <b>6.9<sup>E-06</sup></b><br>(± 1.8E-06) | <b>9.2<sup>E-06</sup></b><br>(± 1.7E-06) | <b>1.5<sup>E-05</sup></b><br>(± 7.1E-07) | <b>3.2<sup>E-05</sup></b><br>(± 4.3E-06) | <b>9.3<sup>E-05</sup></b><br>(± 2.1E-05) | <b>2.0<sup>E-04</sup></b><br>(± 6.2E-05) | <b>3.9<sup>E-04</sup></b><br>(± 4E-05)   | <b>6.2<sup>E-04</sup></b><br>(± 1.7E-04) |
| <i>PsaC (nmol/seedling)</i>                     | Immunodetection | n.d                                      | n.d                                      | n.d                                      | <b>1.6<sup>E-05</sup></b><br>(± 2.5E-06) | <b>7.3<sup>E-05</sup></b><br>(± 2.4-E05) | <b>1.1<sup>E-04</sup></b><br>(± 7.2-E05) | <b>1.7<sup>E-04</sup></b><br>(± 4.2-E05) | <b>2.3<sup>E-04</sup></b><br>(± 1E-04)   |
| <i>PetC (nmol/seedling)</i>                     | Immunodetection | <b>2.7<sup>E-05</sup></b><br>(± 7.8E-06) | <b>2.8<sup>E-05</sup></b><br>(± 9.8E-06) | <b>2.5<sup>E-05</sup></b><br>(± 4.5E-06) | <b>5.3<sup>E-05</sup></b><br>(± 2.2E-05) | <b>1.2<sup>E-04</sup></b><br>(± 4.1E-05) | <b>1.8<sup>E-04</sup></b><br>(± 3.4E-05) | <b>5.7<sup>E-04</sup></b><br>(± 1.8E-04) | <b>7.9<sup>E-04</sup></b><br>(± 3.7E-04) |

|                      | T0                                              | T4                                              | T8                                              | T12                                             | T24                                             | T48                                             | T72                                             | T96                                             |
|----------------------|-------------------------------------------------|-------------------------------------------------|-------------------------------------------------|-------------------------------------------------|-------------------------------------------------|-------------------------------------------------|-------------------------------------------------|-------------------------------------------------|
| MGDG                 | <b>1.11<sup>E+07</sup></b><br>SD = +/- 3.64E+05 | <b>1.15<sup>E+07</sup></b><br>SD = +/- 1.01E+06 | <b>1.11<sup>E+07</sup></b><br>SD = +/- 1.10E+06 | <b>1.75<sup>E+07</sup></b><br>SD = +/- 1.79E+06 | <b>4.16<sup>E+07</sup></b><br>SD = +/- 4.27E+06 | <b>8.65<sup>E+07</sup></b><br>SD = +/- 5.96E+06 | <b>1.68<sup>E+08</sup></b><br>SD = +/- 8.86E+06 | <b>2.35<sup>E+08</sup></b><br>SD = +/- 1.94E+07 |
| DGDG                 | <b>3.64<sup>E+06</sup></b><br>SD = +/- 4.04E+05 | <b>4.23<sup>E+06</sup></b><br>SD = +/- 5.29E+05 | <b>4.10<sup>E+06</sup></b><br>SD = +/- 1.31E+05 | <b>6.26<sup>E+06</sup></b><br>SD = +/- 4.70E+05 | <b>1.32<sup>E+07</sup></b><br>SD = +/- 9.73E+05 | <b>2.32<sup>E+07</sup></b><br>SD = +/- 1.83E+06 | <b>3.97<sup>E+07</sup></b><br>SD = +/- 2.56E+06 | <b>5.48<sup>E+07</sup></b><br>SD = +/- 3.71E+06 |
| PSII                 | <b>2.04<sup>E+06</sup></b><br>SD = +/- 5.38E+05 | <b>2.74<sup>E+06</sup></b><br>SD = +/- 5.30E+05 | <b>4.40<sup>E+06</sup></b><br>SD = +/- 2.12E+05 | <b>9.91<sup>E+06</sup></b><br>SD = +/- 1.29E+06 | <b>2.75<sup>E+07</sup></b><br>SD = +/- 6.42E+06 | <b>6.06<sup>E+07</sup></b><br>SD = +/- 1.85E+07 | <b>1.15<sup>E+08</sup></b><br>SD = +/- 1.19E+07 | <b>1.83<sup>E+08</sup></b><br>SD = +/- 5.17E+07 |
| PSI                  | <b>0<sup>E+00</sup></b><br>SD = +/- 0E+00       | <b>0<sup>E+00</sup></b><br>SD = +/- 0E+00       | <b>0<sup>E+00</sup></b><br>SD = +/- 0E+00       | <b>8.95<sup>E+05</sup></b><br>SD = +/- 4.49E+05 | <b>1.33<sup>E+07</sup></b><br>SD = +/- 4.31E+06 | <b>2.10<sup>E+07</sup></b><br>SD = +/- 1.30E+07 | <b>3.04<sup>E+07</sup></b><br>SD = +/- 7.55E+06 | <b>4.24<sup>E+07</sup></b><br>SD = +/- 1.89E+07 |
| Cyt b <sub>6</sub> f | <b>7.99<sup>E+05</sup></b><br>SD = +/- 2.33E+05 | <b>8.43<sup>E+05</sup></b><br>SD = +/- 2.91E+05 | <b>7.50<sup>E+05</sup></b><br>SD = +/- 1.33E+05 | <b>1.57<sup>E+06</sup></b><br>SD = +/- 6.71E+05 | <b>3.44<sup>E+06</sup></b><br>SD = +/- 1.22E+06 | <b>5.30<sup>E+06</sup></b><br>SD = +/- 1.01E+06 | <b>1.69<sup>E+07</sup></b><br>SD = +/- 5.48E+06 | <b>2.37<sup>E+07</sup></b><br>SD = +/- 1.11E+07 |

surface in nm<sup>2</sup>      reference

|                                                                |      |                             |
|----------------------------------------------------------------|------|-----------------------------|
| MGDG                                                           | 0.82 | <i>Bottier et al., 2007</i> |
| DGDG                                                           | 0.64 | <i>Bottier et al., 2007</i> |
| PSII -LHCII<br>(C <sub>2</sub> S <sub>2</sub> M <sub>2</sub> ) | 494  | <i>Caffari et al., 2014</i> |
| cyt b <sub>6</sub> f                                           | 49.5 | <i>Kurusu et al., 2003</i>  |
| PSI                                                            | 300  | <i>Caffari et al., 2014</i> |
